# Supplementary material for: Power of PgR expression as a prognostic factor for ER-positive/HER2-negative breast cancer patients at intermediate risk classified by the Ki67 labeling index
Source: Springer Nature journal article supplement (doi:10.1186/s12885-017-3331-4), 2017-05-22
Supplement: MOESM1 [file 12305218]

**Additional File 1**

Results of a multivariate survival analysis on the influence of clinicopathological variables including PgR in the intermediate Ki67 labeling index group

| Characteristics            | RFS      |          |            | CSS   |          |            |
|----------------------------|----------|----------|------------|-------|----------|------------|
|                            | HR       | <i>P</i> | 95%CI      | HR    | <i>P</i> | 95%CI      |
| PgR expression             | Referent |          |            |       |          |            |
| ≥ 20%                      | Referent |          |            |       |          |            |
| < 20%                      | 4.72     | 0.00042  | 1.99-11.19 | 11.09 | 0.00025  | 3.06-40.18 |
| Menopausal status          | Referent |          |            |       |          |            |
| Pre-                       | Referent |          |            |       |          |            |
| Post-                      | 1.18     | 0.71     | 0.50-2.79  | 0.41  | 0.15     | 0.12-1.39  |
| Pathological T stage       | Referent |          |            |       |          |            |
| T 1-2                      | Referent |          |            |       |          |            |
| T 3-4                      | 1.19     | 0.75     | 0.41-3.45  | 0.31  | 0.18     | 0.05-1.75  |
| Pathological N stage       | Referent |          |            |       |          |            |
| N 0                        | Referent |          |            |       |          |            |
| N 1-3                      | 3.17     | 0.020    | 1.20-8.39  | 2.64  | 0.10     | 0.83-8.41  |
| Histological grade         | Referent |          |            |       |          |            |
| 1,2                        | Referent |          |            |       |          |            |
| 3                          | 1.25     | 0.59     | 0.56-2.82  | 2.44  | 0.11     | 0.81-7.36  |
| Adjuvant chemotherapy      | Referent |          |            |       |          |            |
| No                         | Referent |          |            |       |          |            |
| Yes                        | 0.81     | 0.63     | 0.35-1.90  | 0.65  | 0.40     | 0.24-1.77  |
| Adjuvant endocrine therapy | Referent |          |            |       |          |            |
| No                         | Referent |          |            |       |          |            |
| Yes                        | 0.56     | 0.39     | 0.15-2.11  | 1.41  | 0.75     | 0.17-11.91 |

## Abbreviations:

RFS, Recurrence-free survival; CSS, Cancer-specific survival; HR, Hazard Ratio; 95% CI, 95% Confidence interval; PgR, progesterone receptor.
